# Supplementary material for: Survival Benefit of Neoadjuvant Chemotherapy with S-1 Plus Docetaxel for Locally Advanced Gastric Cancer: A Propensity Score-Matched Analysis
Source: Springer Nature journal article supplement (doi:10.1245/s10434-019-07299-7), 2019-04-11
Supplement: MOESM1 [file 16650370]

**Supple. TABLE 1. Adverse Events Associated with Neoadjuvant Chemotherapy**

(NAC) According to the NCI-CTC Grade

---

(Number of patients)

| Adverse Event          | Gr 1 | Gr 2 | Gr 3 | Gr 4 | Gr 3/4(%) |
|------------------------|------|------|------|------|-----------|
| <b>Hematologic</b>     |      |      |      |      |           |
| Leukocytopenia         | 9    | 8    | 9    | 0    | 23.1      |
| Neutrocytopenia        | 0    | 4    | 9    | 1    | 25.6      |
| Anemia                 | 0    | 2    | 2    | 0    | 5.1       |
| Thrombocytopenia       | 1    | 0    | 0    | 0    | 0.0       |
| Total bilirubin        | 0    | 0    | 1    | 0    | 2.6       |
| AST                    | 0    | 0    | 2    | 0    | 5.1       |
| ALT                    | 0    | 0    | 2    | 0    | 5.1       |
| <b>Non-hematologic</b> |      |      |      |      |           |
| Nausea                 | 3    | 0    | 2    | 0    | 5.1       |
| Vomiting               | 1    | 0    | 0    | 0    | 0.0       |
| Diarrhea               | 0    | 4    | 3    | 0    | 7.7       |

|                     |   |   |   |   |     |
|---------------------|---|---|---|---|-----|
| Appetite loss       | 1 | 0 | 2 | 0 | 5.1 |
| General malaise     | 1 | 0 | 0 | 0 | 0.0 |
| Skin reaction       | 1 | 2 | 0 | 0 | 0.0 |
| Alopecia            | 1 | 0 | 0 | 0 | 0.0 |
| Febrile neutropenia | 0 | 0 | 1 | 0 | 2.6 |
| Epistaxis           | 1 | 0 | 0 | 0 | 0.0 |

---

Gr, Grade; Common Terminology Criteria for Adverse Events (CTCAE) v4.0
