# Supplementary material for: Survival Benefit of Neoadjuvant Chemotherapy with S-1 Plus Docetaxel for Locally Advanced Gastric Cancer: A Propensity Score-Matched Analysis
Source: Springer Nature journal article supplement (doi:10.1245/s10434-019-07299-7), 2019-04-11
Supplement: MOESM2 [file 16650370]

**Supple. TABLE 2. Postoperative S-1 administration after for the NAC DS and Surgery first groups according to stages (Japanese Classification of Gastric Carcinoma (Third English Edition))**

| (y)pStages                                                      | NAC DS<br>(n=39) | surgery first<br>(n=37) | p-value  |
|-----------------------------------------------------------------|------------------|-------------------------|----------|
| Cases with postoperative S-1 administration for 1 year or under |                  |                         |          |
| All (yes/no)                                                    | 33 (84.6%)/ 6    | 24 (64.9%)/ 13          | p=0.0469 |
| Excluding pStage I for upfront surgery                          | 33 (84.6%)/ 6    | 24 (77.4%)/ 7           | p=0.4419 |
| ypT0N0 (yes/no)                                                 | 1 (50.0%)/ 1     | 0/ 0                    |          |
| (y)pStageIA-B (yes/no)                                          | 9 (90%)/ 1       | 0 (0.0%)/ 6             |          |

|                          |               |                |          |
|--------------------------|---------------|----------------|----------|
| (y)pStageIIA-B (yes/no)  | 11 (84.6%)/ 2 | 6 (75%)/ 2     | p=0.5858 |
| (y)pStageIIIA-C (yes/no) | 12 (85.7%)/ 2 | 18 (78.3%) / 5 | p=0.5745 |

---

Complete Postoperative S-1 administration cases for 1 year

---

|                                        |                |                 |          |
|----------------------------------------|----------------|-----------------|----------|
| All (yes/no)                           | 15 (38.5%)/ 24 | 18 (48.6%)/ 19  | p=0.3705 |
| Excluding pStage I for upfront surgery | 15 (38.5%)/ 24 | 18 (58.1%)/ 13  | p=0.1027 |
| ypT0N0 (yes/no)                        | 0 (0.0%)/ 2    | 0/ 0            |          |
| (y)pStageIA-B (yes/no)                 | 4 (40%)/ 6     | 0 (0.0%)/ 6     |          |
| (y)pStageIIA-B (yes/no)                | 3 (23.1%)/ 10  | 6 (75%)/ 2      | p=0.0195 |
| (y)pStageIIIA-C (yes/no)               | 8 (57.1%)/ 6   | 12 (52.2%) / 11 | p=0.7687 |

---
