# Supplementary material for: Survival Benefit of Neoadjuvant Chemotherapy with S-1 Plus Docetaxel for Locally Advanced Gastric Cancer: A Propensity Score-Matched Analysis
Source: Springer Nature journal article supplement (doi:10.1245/s10434-019-07299-7), 2019-04-11
Supplement: MOESM3 [file 16650370]

**Supple. TABLE 3. Postoperative S-1 administration after for the NAC DS groups according to pathological responses (Japanese Classification of Gastric Carcinoma (Third English Edition))**

| Pathological grade                                              | NAC DS<br>(n=39) |
|-----------------------------------------------------------------|------------------|
| Cases with postoperative S-1 administration for 1 year or under |                  |
| All (yes/no)                                                    | 33 (84.6%)/ 6    |
| Grade 0 (yes/no)                                                | 4 (80%)/ 1       |
| Grade 1a (yes/no)                                               | 10 (83.3%)/ 2    |
| Grade 1b (yes/no)                                               | 8 (88.9%)/ 1     |
| Grade 2 (yes/no)                                                | 10 (90.9%)/ 1    |
| Grade 3 (yes/no)                                                | 1 (50%)/ 1       |
| Cases with postoperative S-1 administration for 1 year          |                  |
| All (yes/no)                                                    | 15 (38.5%)/ 24   |

|                   |              |
|-------------------|--------------|
| Grade 0 (yes/no)  | 2 (40%)/ 3   |
| Grade1a (yes/no)  | 6 (50%)/ 6   |
| Grade 1b (yes/no) | 3 (33.3%)/ 6 |
| Grade 2 (yes/no)  | 4 (36.4%)/ 7 |
| Grade 3 (yes/no)  | 0 (0.0%)/ 2  |

---
